# Supplementary material
Source: PubMed Central journal article supplement (PMC5773412)
Supplement: NIHMS924023-supplement-1.pdf [file NIHMS924023-supplement-1.pdf]

**Supplementary Table 1.** Details of individual patient characteristics and samples analysed from each patient.

| Pt | Histologic subtype | Age | Gender | Stage | Prior ipilimumab | Treatment               | Biopsy location   | ORR | PFS  | OS   | IHC | Lymphoid infiltrates | Fibrosis | WE S | Tumour Source | Normal Source | Sequencing Platform | Tumour Depth | Normal Depth | Estimated Tumour Cellularity fraction | Effective Tumour Depth | Nonsynonymous Mutations | Exonic Sequencing Footprint (Mb) | Mutations/Megabase |
|----|--------------------|-----|--------|-------|------------------|-------------------------|-------------------|-----|------|------|-----|----------------------|----------|------|---------------|---------------|---------------------|--------------|--------------|---------------------------------------|------------------------|-------------------------|----------------------------------|--------------------|
| 1  | Mixed              | 61  | M      | M1c   | Yes              | Pembrolizumab           | primary           | CR  | 26.7 | 26.7 | Yes | 0                    | 3        | No   | NA            | NA            | NA                  | NA           | NA           | NA                                    | NA                     | NA                      | NA                               | NA                 |
| 2  | Pure               | 70  | M      | M1a   | Yes              | Pembrolizumab           | locally recurrent | CR  | 9.9  | 9.9  | Yes | 3                    | 1        | No   | NA            | NA            | NA                  | NA           | NA           | NA                                    | NA                     | NA                      | NA                               | NA                 |
| 3  | Mixed              | 54  | M      | M1b   | No               | BMS-936559 (anti-PD-L1) | metastatic        | CR  | 55.3 | 55.3 | Yes | 2                    | 3        | No   | NA            | NA            | NA                  | NA           | NA           | NA                                    | NA                     | NA                      | NA                               | NA                 |
| 4  | Pure               | 62  | F      | M1b   | Yes              | Pembrolizumab           | metastatic        | CR  | 42.4 | 42.4 | Yes | 0                    | 3        | No   | NA            | NA            | NA                  | NA           | NA           | NA                                    | NA                     | NA                      | NA                               | NA                 |
| 5  | Pure               | 83  | M      | M1c   | Yes              | Pembrolizumab           | metastatic        | CR  | 14.1 | 14.1 | Yes | 2                    | 3        | Yes  | FFPE          | PBMC          | HiSeq2500 2x100     | 223          | 151          | 0.38                                  | 88.54                  | 3058                    | 27.6                             | 110.8              |
| 6  | Pure               | 71  | M      | M1c   | No               | Pembrolizumab           | metastatic        | PD  | 1    | 1    | Yes | NA                   | NA       | No   | NA            | NA            | NA                  | NA           | NA           | NA                                    | NA                     | NA                      | NA                               | NA                 |
| 7  | Mixed              | 74  | M      | M1c   | Yes              | Pembrolizumab           | metastatic        | CR  | 31.3 | 31.3 | Yes | 0                    | 1        | Yes  | FFPE          | FFPE          | HiSeq2500 2x100     | 136.8        | 33.9         | 0.51                                  | 69.77                  | 1310                    | 27.6                             | 47.46              |
| 8  | Mixed              | 75  | F      | M1b   | No               | Nivolumab + ipilimumab  | primary           | PR  | 13.9 | 36.9 | Yes | 2                    | 3        | No   | NA            | NA            | NA                  | NA           | NA           | NA                                    | NA                     | NA                      | NA                               | NA                 |
| 9  | Pure               | 79  | F      | M1b   | No               | Nivolumab               | locally recurrent | PR  | 10   | 63   | Yes | 2                    | 2        | Yes  | Fresh Frozen  | PBMC          | HiSeq2500 2x100     | 199.84       | 171.26       | 0.27                                  | 53.96                  | 1868                    | 27.6                             | 67.68              |
| 10 | Pure               | 67  | F      | M1b   | Yes              | Pembrolizumab           | Metastatic        | PR  | 28.2 | 42   | Yes | 3                    | 3        | Yes  | FFPE          | FFPE          | HiSeq2500 2x100     | 57.55        | 215.8        | 0.26                                  | 14.82                  | 670                     | 27.6                             | 18.3               |
| 11 | Mixed              | 63  | M      | M1c   | Yes              | Pembrolizumab           | primary           | PR  | 55.2 | 55.2 | Yes | 2                    | 3        | No   | NA            | NA            | NA                  | NA           | NA           | NA                                    | NA                     | NA                      | NA                               | NA                 |
| 12 | Mixed              | 75  | F      | M1c   | Yes              | Pembrolizumab           | Primary           | PR  | 8.9  | 16   | Yes | 3                    | 2        | Yes  | FFPE          | FFPE          | HiSeq2500 2x100     | 64.24        | 55.69        | 0.18                                  | 11.56                  | 212                     | 27.6                             | 7.68               |
| 13 | Mixed              | 52  | F      | M1c   | Yes              | Pembrolizumab           | metastatic        | PR  | 20.6 | 20.6 | Yes | 0                    | 2        | Yes  | FFPE          | FFPE          | HiSeq2500 2x100     | 130.7        | 25           | 0.75                                  | 93.24                  | 1688                    | 27.6                             | 61.16              |

|    |         |    |   |     |     |                               |                   |    |      |      |     |    |    |     |              |      |                 |        |        |      |        |      |      |       |    |
|----|---------|----|---|-----|-----|-------------------------------|-------------------|----|------|------|-----|----|----|-----|--------------|------|-----------------|--------|--------|------|--------|------|------|-------|----|
| 14 | Mixed   | 66 | M | M1c | No  | Pembrolizumab                 | primary           | PD | 2.7  | 18.2 | No  | 2  | 3  | Yes | FFPE         | FFPE | HiSeq2500 2x100 | 121    | 67.1   | 0.18 | 21.78  | 525  | 27.6 | 19.02 |    |
| 15 | Pure    | 60 | M | M1c | Yes | Pembrolizumab                 | metastatic        | PD | 3.4  | 20.7 | Yes | 2  | 1  | Yes | FFPE         | FFPE | HiSeq2500 2x100 | 143.25 | 70     | 0.21 | 30.08  | 1695 | 27.6 | 61.41 |    |
| 16 | Pure    | 85 | M | M1b | Yes | Pembrolizumab                 | locally recurrent | PD | 3.6  | 11.7 | Yes | 0  | 1  | Yes | FFPE         | FFPE | HiSeq2500 2x100 | 48.8   | 42     | 0.45 | 21.96  | 659  | 27.6 | 23.88 |    |
| 17 | Pure    | 62 | M | M1c | Yes | Pembrolizumab                 | locally recurrent | PD | 3.3  | 7.5  | Yes | 0  | 2  | Yes | FFPE         | FFPE | HiSeq3000 2x150 | 201    | 77.6   | 0.38 | 76.38  | 1717 | 27.6 | 62.21 |    |
| 18 | Pure    | 67 | M | M1c | Yes | Pembrolizumab with ipilimumab | Primary           | PR | 20   | 20   | Yes | NA | NA | Yes | FFPE         | FFPE | HiSeq2500 2x100 | 60     | 73.6   | 0.27 | 16.2   | 824  | 27.6 | 29.86 |    |
| 19 | Mixed   | 59 | M | M1c | No  | Pembrolizumab                 | metastatic        | SD | 12.4 | 12.4 | Yes | NA | NA | Yes | Fresh Frozen | PBMC | HiSeq2500 2x100 | 217    | 235    | 0.49 | 106.33 | 1533 | 27.6 | 55.54 |    |
| 20 | Mixed   | 85 | M | M1c | No  | Pembrolizumab                 | metastatic        | PR | 8    | 9.1  | No  | NA | NA | Yes | Fresh Frozen | PBMC | HiSeq2500 2x100 | 159.08 | 159.25 | 0.14 | 22.27  | 1395 | 27.6 | 50.54 |    |
| 21 | unknown | 33 | F | M1c | No  | Nivolumab                     | metastatic        | PR | 8    | 62.6 | No  | 3  | 0  | Yes | FFPE         | PBMC | HiSeq2500 2x100 | 152.1  | 171.26 | 0.64 | 96.64  | 509  | 27.6 | 18.44 |    |
| 22 | Pure    | 60 | M | M1b | No  | Pembrolizumab                 | locally recurrent | PR | 31.5 | 31.5 | No  | NA | NA | Yes | Fresh Frozen | PBMC | HiSeq2500 2x100 | 195.33 | 181.39 | 0.14 | 27.35  | 1282 | 27.6 | 46.45 |    |
| 23 | Mixed   | 61 | M | M1b | Yes | Pembrolizumab                 | locally recurrent | PD | 2.8  | 5.6  | No  | NA | NA | Yes | Fresh Frozen | PBMC | HiSeq2500 2x100 | 93.56  | 125    | 0.59 | 55.46  | 1129 | 27.6 | 40.91 |    |
| 24 | Pure    | 79 | M | 3C  | No  | Pembrolizumab                 | primary           | CR | 14.8 | 14.8 | Yes | 3  | 3  | Yes | FFPE         | PBMC | HiSeq2500 2x100 | 94.5   | 131    | 0.16 | 15.12  | 462  | 27.6 | 16.74 |    |
| 25 | unknown | 71 | M | M1c | Yes | Pembrolizumab                 | locally recurrent | CR | 35.6 | 35.6 | No  | 2  | 1  | No  | NA           | NA   | NA              | NA     | NA     | NA   | NA     | NA   | NA   | NA    | NA |
| 26 | unknown | 78 | M | M1b | No  | Pembrolizumab                 | locally recurrent | CR | 40.7 | 40.7 | No  | 0  | 1  | No  | NA           | NA   | NA              | NA     | NA     | NA   | NA     | NA   | NA   | NA    | NA |
| 27 | Mixed   | 76 | M | M1a | No  | BMS-936559                    | metastatic        | PD | 1.4  | 4.2  | No  | 2  | 3  | No  | NA           | NA   | NA              | NA     | NA     | NA   | NA     | NA   | NA   | NA    | NA |
| 28 | Pure    | 81 | M | M1c | No  | Pembrolizumab                 | primary           | PR | 38.1 | 38.1 | No  | 2  | 3  | No  | NA           | NA   | NA              | NA     | NA     | NA   | NA     | NA   | NA   | NA    | NA |
| 29 | Pure    | 80 | F | M1c | No  | Nivolumab                     | metastatic        | PD | 1.2  | 3.6  | No  | 0  | 1  | No  | NA           | NA   | NA              | NA     | NA     | NA   | NA     | NA   | NA   | NA    | NA |
| 30 | Pure    | 83 | M | M1c | Yes | Pembrolizumab                 | Lymph node        | SD | 14.1 | 14.1 | No  | NA | 0  | No  | NA           | NA   | NA              | NA     | NA     | NA   | NA     | NA   | NA   | NA    | NA |

|    |         |    |   |     |     |               |                   |    |      |      |    |    |   |    |    |    |    |    |    |    |    |    |    |    |    |
|----|---------|----|---|-----|-----|---------------|-------------------|----|------|------|----|----|---|----|----|----|----|----|----|----|----|----|----|----|----|
| 31 | Pure    | 75 | M | M1c | No  | Pembrolizumab | locally recurrent | PD | 2    | 3.6  | No | 0  | 3 | No | NA |
| 32 | Mixed   | 86 | M | M1c | Yes | Pembrolizumab | primary           | CR | 8.6  | 8.6  | No | 4  | 2 | No | NA |
| 33 | Mixed   | 70 | M | M1c | Yes | Pembrolizumab | locally recurrent | PD | 2.7  | 5.9  | No | 2  | 1 | No | NA |
| 34 | Mixed   | 70 | M | M1c | No  | Pembrolizumab | metastatic        | PR | 24   | 24   | No | 0  | 0 | No | NA |
| 35 | unknown | 77 | M | M1b | Yes | Pembrolizumab | Lymph node        | PR | 13.7 | 22.8 | No | NA | 0 | No | NA |
| 36 | Pure    | 73 | M | M1c | No  | Nivolumab     | primary           | PR | 40.2 | 40.2 | No | 2  | 3 | No | NA |
| 37 | Mixed   | 72 | M | M1c | No  | Pembrolizumab | metastatic        | PR | 17.3 | 17.3 | No | 1  | 3 | No | NA |
| 38 | Mixed   | 66 | M | M1c | Yes | Nivolumab     | Lymph node        | PR | 56.5 | 56.5 | No | NA | 0 | No | NA |
| 39 | Pure    | 67 | M | M1a | No  | Pembrolizumab | primary           | PD | 2.9  | 10   | No | 0  | 2 | No | NA |
| 40 | Mixed   | 86 | M | M1c | No  | Pembrolizumab | primary           | PR | 3.5  | 3.5  | No | 2  | 2 | No | NA |

**Figure 3 statistical analyses**

| Table Analyzed                      | CD8-Tumor     | CD8-IM        | PDL1-Tumor | PDL1-IM    |
|-------------------------------------|---------------|---------------|------------|------------|
| Column B                            | DM            | DM            | DM         | DM         |
| vs.                                 | vs.           | vs.           | vs.        | vs.        |
| Column A                            | non-DM        | non-DM        | non-DM     | non-DM     |
| Mann Whitney test                   |               |               |            |            |
| P value                             | 0.1168        | 0.4142        | 0.036      | 0.1623     |
| Exact or approximate P value?       | Exact         | Exact         | Exact      | Exact      |
| P value summary                     | ns            | ns            | *          | ns         |
| Significantly different (P < 0.05)? | No            | No            | Yes        | No         |
| One- or two-tailed P value?         | Two-tailed    | Two-tailed    | Two-tailed | Two-tailed |
| Sum of ranks in column A,B          | 168.5 , 327.5 | 181.5 , 283.5 | 115 , 291  | 125 , 253  |
| Mann-Whitney U                      | 77.5          | 90.5          | 49         | 59         |
| Difference between medians          |               |               |            |            |
| Median of column A                  | 3, n=13       | 18, n=13      | 15, n=11   | 26, n=11   |
| Median of column B                  | 10.3, n=18    | 25, n=17      | 54.3, n=17 | 45.6, n=16 |
| Difference: Actual                  | 7.3           | 7             | 39.3       | 19.6       |
| Difference: Hodges-Lehmann          | 4.2           | 6.1           | 25         | 14.7       |

**Extended Data Figure 6 statistical analyses**

|                         | p value linear regression | Spearman correlation |
|-------------------------|---------------------------|----------------------|
| CD8 IM vs PDL1 Tumor    | 0.007                     | 0.01                 |
| CD8 Tumor vs PDL1 Tumor | 0.15                      | 0.11                 |
| CD8 IM vs PDL1 IM       | 0.0003                    | 0.0002               |
| CD8 Tumor vs PDL1 IM    | 0.04                      | 0.03                 |
| CD8 Tumor vs CD8 IM     | <0.0001                   | 0.0006               |
| PDL1 Tumor vs PDL1 IM   | 0.0003                    | 0.0002               |

| Table Analyzed | CD8-IM    | CD8-Tumor | PDL1-IM   | PDL1-Tumor |
|----------------|-----------|-----------|-----------|------------|
| Column B       | non-DM-PD | non-DM-PD | non-DM-PD | non-DM-PD  |
| vs.            | vs.       | vs.       | vs.       | vs.        |
| Column A       | non-DM-CB | non-DM-CB | non-DM-CB | non-DM-CB  |

| Mann Whitney test                   |             |             |            |            |
|-------------------------------------|-------------|-------------|------------|------------|
| P value                             | 0.0017      | 0.1101      | 0.4286     | 0.9307     |
| Exact or approximate P value?       | Exact       | Exact       | Exact      | Exact      |
| P value summary                     | **          | ns          | ns         | ns         |
| Significantly different (P < 0.05)? | Yes         | No          | No         | No         |
| One- or two-tailed P value?         | Two-tailed  | Two-tailed  | Two-tailed | Two-tailed |
| Sum of ranks in column A,B          | 69.5 , 21.5 | 60.5 , 30.5 | 41 , 25    | 35 , 31    |
| Mann-Whitney U                      | 0.5         | 9.5         | 10         | 14         |

| Difference between medians |           |           |           |            |
|----------------------------|-----------|-----------|-----------|------------|
| Median of column A         | 35, n=7   | 9, n=7    | 42.5, n=6 | 13.65, n=6 |
| Median of column B         | 7.15, n=6 | 2.05, n=6 | 15, n=5   | 15, n=5    |
| Difference: Actual         | -27.85    | -6.95     | -27.5     | 1.35       |
| Difference: Hodges-Lehmann | -22       | -6.45     | -16.5     | 0.7        |

| Table Analyzed | CD8-IM    | CD8-Tumor | PDL1-IM   | PDL1-Tumor |
|----------------|-----------|-----------|-----------|------------|
| Column C       | DM-CB     | DM-CB     | DM-PD     | DM-CB      |
| vs.            | vs.       | vs.       | vs.       | vs.        |
| Column A       | non-DM-CB | non-DM-CB | non-DM-CB | non-DM-CB  |

| Mann Whitney test                   |            |            |            |            |
|-------------------------------------|------------|------------|------------|------------|
| P value                             | 0.5469     | 0.5457     | 0.8        | 0.0622     |
| Exact or approximate P value?       | Exact      | Exact      | Exact      | Exact      |
| P value summary                     | ns         | ns         | ns         | ns         |
| Significantly different (P < 0.05)? | No         | No         | No         | No         |
| One- or two-tailed P value?         | Two-tailed | Two-tailed | Two-tailed | Two-tailed |

|                                     |              |              |            |              |
|-------------------------------------|--------------|--------------|------------|--------------|
| Sum of ranks in column A,C          | 85.5 , 145.5 | 71.5 , 181.5 | 113 , 23   | 40 , 170     |
| Mann-Whitney U                      | 40.5         | 43.5         | 17         | 19           |
| Difference between medians          |              |              |            |              |
| Median of column A                  | 35, n=7      | 9, n=7       | 57.8, n=13 | 13.65, n=6   |
| Median of column C                  | 26.35, n=14  | 12.3, n=15   | 29, n=3    | 48.95, n=14  |
| Difference: Actual                  | -8.65        | 3.3          | -28.8      | 35.3         |
| Difference: Hodges-Lehmann          | -2.75        | 3.3          | -4.6       | 26.7         |
|                                     |              |              |            |              |
| Table Analyzed                      | CD8-IM       | CD8-Tumor    | PDL1-IM    | PDL1-Tumor   |
| Column D                            | DM-PD        | DM-PD        | DM-PD      | DM-PD        |
| vs.                                 | vs.          | vs.          | vs.        | vs.          |
| Column C                            | DM-CB        | DM-CB        | DM-CB      | DM-CB        |
| Mann Whitney test                   |              |              |            |              |
| P value                             | 0.3618       | 0.2561       | 0.8        | 0.9662       |
| Exact or approximate P value?       | Exact        | Exact        | Exact      | Exact        |
| P value summary                     | ns           | ns           | ns         | ns           |
| Significantly different (P < 0.05)? | No           | No           | No         | No           |
| One- or two-tailed P value?         | Two-tailed   | Two-tailed   | Two-tailed | Two-tailed   |
| Sum of ranks in column C,D          | 134 , 19     | 152.5 , 18.5 | 113 , 23   | 126.5 , 26.5 |
| Mann-Whitney U                      | 13           | 12.5         | 17         | 20.5         |
| Difference between medians          |              |              |            |              |
| Median of column C                  | 26.35, n=14  | 12.3, n=15   | 57.8, n=13 | 48.95, n=14  |
| Median of column D                  | 7.2, n=3     | 3, n=3       | 29, n=3    | 62.6, n=3    |
| Difference: Actual                  | -19.15       | -9.3         | -28.8      | 13.65        |
| Difference: Hodges-Lehmann          | -13.15       | -5.3         | -4.6       | -0.05        |

### Extended Data Figure 7 statistical analyses

| Best-fit values ± SE             | Linear reg. of IHC Matrix-DM-CD8 IM vs PDL1 tumor | Linear reg. of IHC Matrix-DM-CD8 tumor vs PDL1 tumor | Linear reg. of IHC Matrix-DM-CD8 IM vs PDL1 IM | Linear reg. of IHC Matrix-DM-CD8 tumor vs PDL1 IM | Linear reg. of IHC Matrix-DM-CD8 tumor vs IM | Linear reg. of IHC Matrix-DM-PDL1 tumor vs IM |
|----------------------------------|---------------------------------------------------|------------------------------------------------------|------------------------------------------------|---------------------------------------------------|----------------------------------------------|-----------------------------------------------|
| Slope                            | 1.003 ± 0.3176                                    | 0.6096 ± 0.3984                                      | 1.226 ± 0.2593                                 | 0.8072 ± 0.3585                                   | 0.8337 ± 0.1332                              | 0.7711 ± 0.1638                               |
| Y-intercept                      | 14.34 ± 10.86                                     | 34.81 ± 10.19                                        | 14.37 ± 8.863                                  | 34.36 ± 9.417                                     | 14.04 ± 3.4                                  | 16.29 ± 8.557                                 |
| X-intercept                      | -14.29                                            | -57.1                                                | -11.72                                         | -42.57                                            | -16.84                                       | -21.13                                        |
| 1/slope                          | 0.9969                                            | 1.641                                                | 0.8156                                         | 1.239                                             | 1.2                                          | 1.297                                         |
| 95% Confidence Intervals         |                                                   |                                                      |                                                |                                                   |                                              |                                               |
| Slope                            | 0.3261 to 1.68                                    | -0.2349 to 1.454                                     | 0.6735 to 1.779                                | 0.04302 to 1.571                                  | 0.5513 to 1.116                              | 0.422 to 1.12                                 |
| Y-intercept                      | -8.804 to 37.47                                   | 13.22 to 56.4                                        | -4.522 to 33.26                                | 14.29 to 54.44                                    | 6.831 to 21.25                               | -1.945 to 34.53                               |
| X-intercept                      | -106.1 to 5.674                                   | -infinity to 10.38                                   | -46.72 to 2.687                                | -1135 to -10.14                                   | -36.13 to -6.529                             | -77.21 to 1.84                                |
| Goodness of Fit                  |                                                   |                                                      |                                                |                                                   |                                              |                                               |
| R square                         | 0.3994                                            | 0.1277                                               | 0.5985                                         | 0.2526                                            | 0.71                                         | 0.5964                                        |
| Sy.x                             | 24.36                                             | 30.54                                                | 19.89                                          | 27.13                                             | 10.34                                        | 19.94                                         |
| Is slope significantly non-zero? |                                                   |                                                      |                                                |                                                   |                                              |                                               |
| F                                | 9.975                                             | 2.341                                                | 22.36                                          | 5.069                                             | 39.17                                        | 22.17                                         |
| DFn, DFd                         | 1, 15                                             | 1, 16                                                | 1, 15                                          | 1, 15                                             | 1, 16                                        | 1, 15                                         |
| P value                          | 0.0065                                            | 0.1455                                               | 0.0003                                         | 0.0398                                            | <0.0001                                      | 0.0003                                        |
| Deviation from zero?             | Significant                                       | Not Significant                                      | Significant                                    | Significant                                       | Significant                                  | Significant                                   |
| Equation                         | Y = 1.003*X + 14.34                               | Y = 0.6096*X + 34.81                                 | Y = 1.226*X + 14.37                            | Y = 0.8072*X + 34.36                              | Y = 0.8337*X + 14.04                         | Y = 0.7711*X + 16.29                          |
| Data                             |                                                   |                                                      |                                                |                                                   |                                              |                                               |
| Number of X values               | 18                                                | 19                                                   | 18                                             | 19                                                | 19                                           | 18                                            |
| Maximum number of Y replicates   | 1                                                 | 1                                                    | 1                                              | 1                                                 | 1                                            | 1                                             |
| Total number of values           | 18                                                | 18                                                   | 17                                             | 17                                                | 18                                           | 17                                            |
| Number of missing values         | 1                                                 | 1                                                    | 1                                              | 2                                                 | 1                                            | 1                                             |
